# Supplementary material for: Cyclic adenosine monophosphate is a key component of regulatory T cell–mediated suppression
Source: PubMed Central journal article supplement — J Exp Med. 2007 Jun 11;204(6):1303–10. doi: 10.1084/jem.20062129 (PMC2118605; doi:10.1084/jem.20062129), 2007-06-11
Supplement: jexpmed_jem.20062129_5.pdf [file jexpmed_jem.20062129_5.pdf]

Table S1.

| Connexin | <u>resting</u> |       | <u>activated</u> |       |
|----------|----------------|-------|------------------|-------|
|          | CD4            | nTreg | CD4              | nTreg |
| Cx26     | -              | -     | -                | -     |
| Cx30     | -              | -     | -                | -     |
| Cx30.3   | -              | -     | -                | -     |
| Cx31     | -              | -     | -                | -     |
| Cx31.1   | +              | +     | ++               | ++    |
| Cx32     | +              | +     | ++               | ++    |
| Cx37     | -              | -     | -                | -     |
| Cx40     | -              | -     | -                | -     |
| Cx43     | +              | +     | ++               | ++    |
| Cx45     | +              | +     | ++               | ++    |
| Cx46     | +              | +     | ++               | ++    |
| Cx50     | -              | -     | -                | -     |
